# Supplementary material
Source: PubMed Central journal article supplement (PMC4329424)
Supplement: legends.pdf [file legends.pdf]

747 **SUPPLEMENTAL MOVIE LEGENDS**

748 **Supplemental Movie 1. Time-lapse fluorescent microscopy reveals a critical role for extracellular**  
749 **calcium and Orai1 in maintenance of cytosolic sodium.** Sequential fluorescent images of dynamic  
750 intracellular sodium signals of confluent PAEC monolayers taken **[A]** in the presence of both Orai1 and 2  
751 mM extracellular calcium, **[B]** in the presence of Orai1 in low extracellular calcium ( $\approx 100$  nM), **[C]** in the  
752 presence of 2 mM extracellular calcium but in the absence of Orai1, and **[D]** in the absence of Orai1 in  
753 low extracellular calcium ( $\approx 100$  nM). The images were taken using Zeiss Axiovert D-1 fluorescent  
754 microscope with a 40 $\times$  oil immersion objective at the rate of 1 frame every 5 seconds. The duration of  
755 the time course was 1200 seconds. Before imaging, the cells were incubated with 5.05  $\mu$ M ANG-2 / AM  
756 (TEFLABS, 3502) intracellular sodium indicator and 8  $\mu$ l Pluronic F-127 10% solution (Invitrogen,  
757 P6866) in 2 ml Krebs-Henseleit Buffer (Sigma, K3753) at 37  $^{\circ}$ C and 5% CO<sub>2</sub> for 1 hour.

758  
759 **Supplemental Movie 2. Time-lapse fluorescent microscopy demonstrates the importance of Orai1 in**  
760 **the anomalous mole fraction effect, e.g., calcium inhibition of sodium entry.** Sequential fluorescent  
761 images of dynamic intracellular sodium signals of confluent PAEC monolayers in nominal calcium-free  
762 ( $\sim 100$  nM extracellular calcium) buffer taken **[A]** in the presence, or **[B]** in the absence, of Orai1.  
763 Images were captured using a Zeiss Axiovert D-1 fluorescent microscope with a 40 $\times$  oil immersion  
764 objective. The imaging speed was 1 frame per 5 seconds. Thapsigargin (1  $\mu$ M) was added at 200  
765 seconds. Extracellular calcium 500  $\mu$ M was added back at 700 seconds. The duration of the sequential  
766 imaging was 1200 seconds. Before imaging, the cells were incubated with 5.05  $\mu$ M ANG-2 / AM  
767 (TEFLABS, 3502) intracellular sodium indicator and 8  $\mu$ l Pluronic F-127 10% solution (Invitrogen,  
768 P6866) in 2 ml Krebs-Henseleit Buffer (Sigma, K3753) at 37  $^{\circ}$ C and 5% CO<sub>2</sub> for 1 hour.
